# Supplementary material for: Preparation and characterization of Silicalite-1 zeolites with high manganese contents from mechanochemically pretreated reactants
Source: Royal Society of Chemistry journal article supplement (doi:10.1039/c4ta06246a), 2015-01-01
Supplement: c4ta06246a1.pdf [file c4ta06246a1.pdf]

## Supporting information

### Preparation and Characterization of Silicalite-1 Zeolites with High Manganese Content from Mechanochemically Pretreated Reactants

Takayuki Iida<sup>1</sup>, Mitsutaka Sato<sup>2</sup>, Chiya Numako<sup>3</sup>, Atsushi Nakahira<sup>4</sup>, Shinji Kohara<sup>5</sup>,  
Tatsuya Okubo<sup>1</sup> and Toru Wakihara<sup>1\*</sup>

1) Department of Chemical System Engineering, The University of Tokyo, 7-3-1 Hongo, Bunkyo-ku, Tokyo 113-8656, Japan

2) Institute of Materials Research, Osaka Center, Tohoku University, 1-1 Gakuencho, Naka-ku, Sakai, Osaka 599-8531, Japan

3) Graduate School of Science, Chiba University, 1-33 Yayoicho, Inage-ku, Chiba 263-8522, Japan

4) Department of Materials Science, Graduate School of Engineering, Osaka Prefecture University, 1-1 Gakuencho, Naka-ku, Sakai, Osaka 599-8531, Japan

5) Japan Synchrotron Radiation Research Institute (JASRI), Sayo, Hyogo 679-5198, Japan

E-mail: wakihara@chemsys.t.u-tokyo.ac.jp

Lab website: <http://www.zeolite.t.u-tokyo.ac.jp>

## Contents

- Figure S1      Total structure factor,  $S(Q)$ , of the mixtures with different mechanochemical treating periods used for calculation of  $G(r)$ .
- Figure S2      SEM images of Mn-Silicalite-1 zeolite samples.
- Figure S3      XRD patterns of Mn-S samples synthesized using Mn-Si mixed oxide composite with  $\text{Mn}/(\text{Mn}+\text{Si}) = 10 \text{ mol\%}$  at various synthetic periods and  $\text{H}_2\text{O}/\text{T}$  ratio.
- Figure S4      XRD patterns of Mn-S samples synthesized using Mn-Si mixed oxide composite with  $\text{Mn}/(\text{Mn}+\text{Si}) = 6 \text{ mol\%}$  at synthesis periods of 1 day and 3 days.
- Figure S5.      XPS results of Mn-Silicalite-1 zeolite samples.

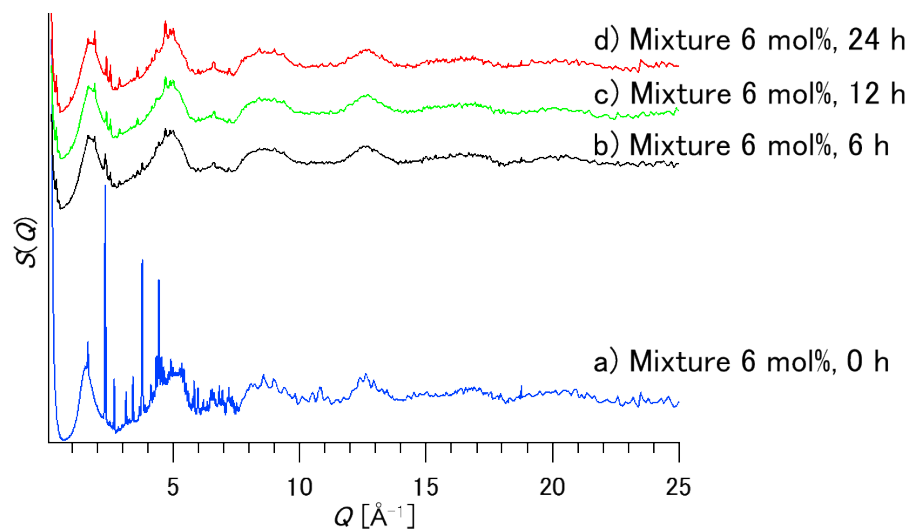

Figure S1. Total structure factor  $S(Q)$  of  $\text{Mn}_2\text{O}_3/\text{fumed silica}$  mixtures during mechanochemical treatment. a) Initial 6 mol% Mn mixture, b) 6 mol% Mn mixture after 6 h, c) 6 mol% Mn mixture after 12 h, and d) 6 mol% Mn mixture after 24 h.

Mn-S 6 mol% Mech

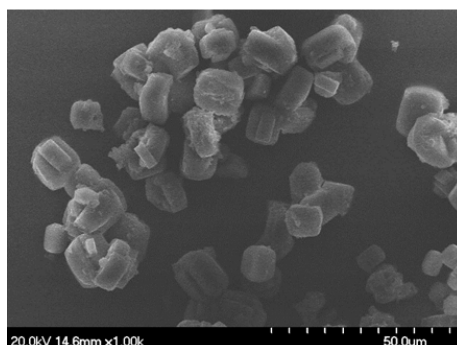

Mn-S 10 mol% Mech

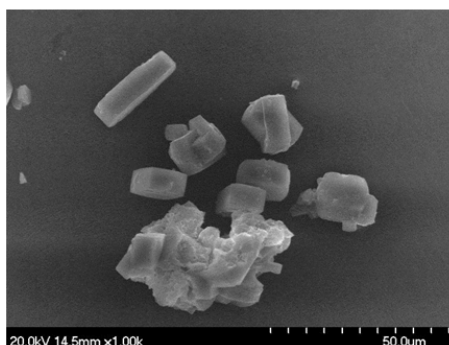

50  $\mu$  m

Figure S2. SEM images of Mn-Silicalite-1 zeolite samples. (Left) Mn-S 6 mol% Mech and (Right) Mn-S 10 mol% Mech.

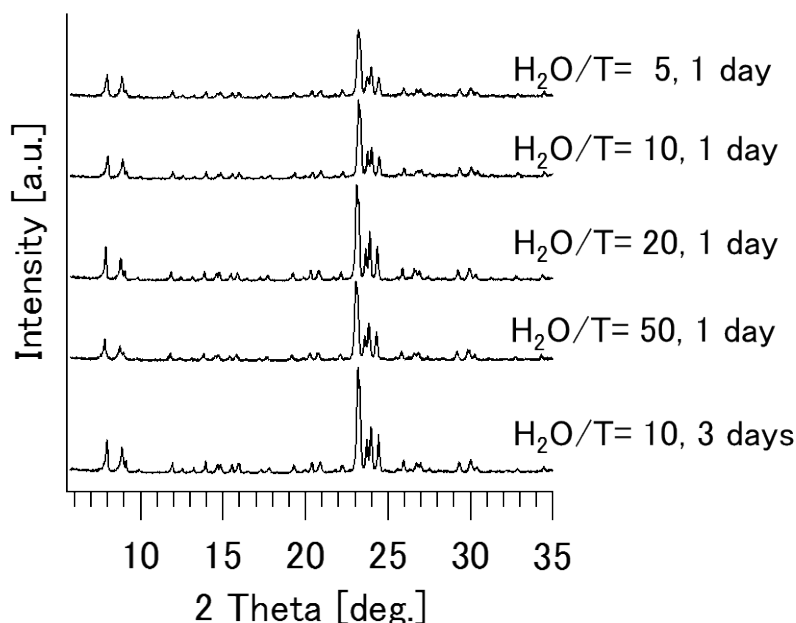

Figure S3. XRD patterns of Mn-S samples synthesized using Mn-Si mixed oxide composite with  $Mn/(Mn+Si) = 10 \text{ mol\%}$  at various synthetic periods and  $H_2O/T$  ratio.

It is clarified by comparing the crystallinity of Mn-S samples synthesized in 1 day and 3 days using  $H_2O/T = 10$  that one day treatment was not enough for the complete crystallization of Mn silicalite-1 from Mn-Si mixed oxide composite with  $Mn/(Mn+Si) = 10 \text{ mol\%}$ . The effect of  $H_2O/T$  on the crystallization kinetics was also investigated ( $H_2O/T = 5, 10, 20$ , and  $50$ ). The amount of water has little effect on the crystallization kinetics because the crystallization occurs via a solid transformation mechanism, unlike solution-mediated crystallizations. This crystallization mechanism can explain the successful incorporation of manganese into the framework.

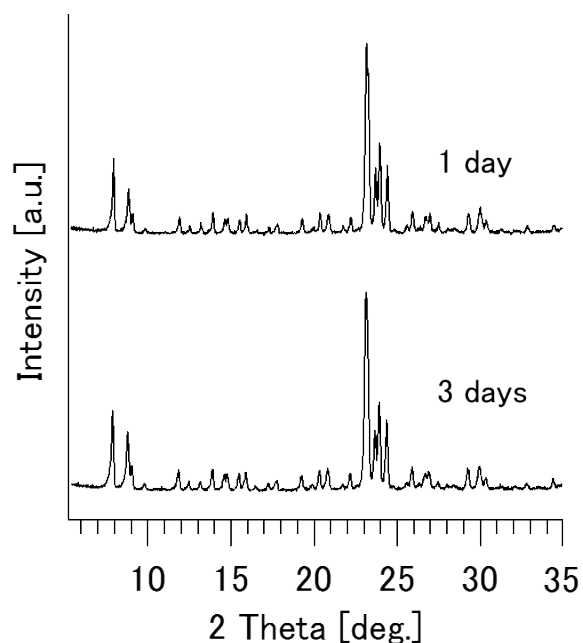

Figure S4. XRD patterns of Mn-S samples synthesized using Mn-Si mixed oxide composite with  $\text{Mn}/(\text{Mn}+\text{Si}) = 6 \text{ mol\%}$  at synthesis periods of 1 day and 3 days.

From Figure S4, complete crystallization has proceeded in one day when Mn-Si mixed oxide composite with  $\text{Mn}/(\text{Mn}+\text{Si}) = 6 \text{ mol\%}$  was used. This is in contrary with the case when using Mn-Si mixed oxide composite with  $\text{Mn}/(\text{Mn}+\text{Si}) = 10 \text{ mol\%}$  shown in Figure S3.

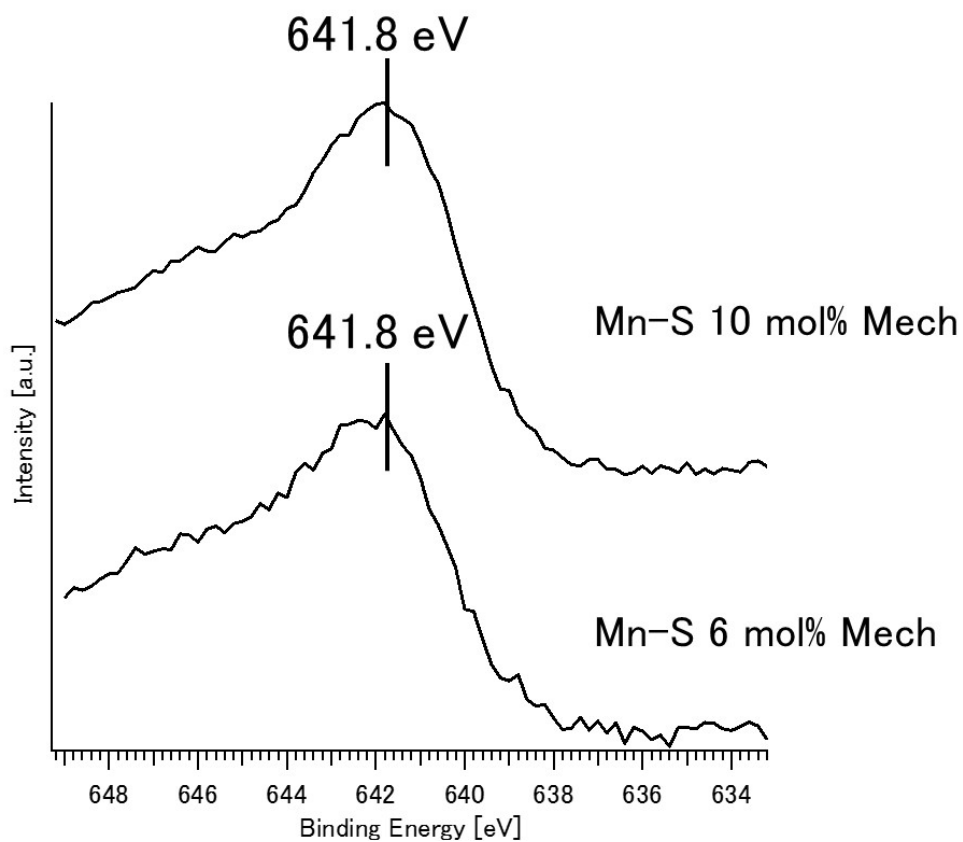

Figure S5. XPS results of Mn-Silicalite-1 zeolite samples.

The signals observed at 641.8 eV are attributed to the  $\text{Mn}^{3+}$ . According to literature [H. Nesbitt, D. Banerjee, *Am. Mineral.*, 1998, **83**, 305–315.], signals from  $\text{Mn}^{2+}$  are present at  $640.8 \pm 0.3$  eV, while signals from  $\text{Mn}^{3+}$  are present around  $641.8 \pm 0.1$  eV.
